# Supplementary material for: Socioeconomic status and modification of atherosclerotic cardiovascular disease risk prediction: epidemiological analysis using data from the atherosclerosis risk in communities study
Source: HighWire-hosted journal article supplement (doi:10.1136/bmjopen-2021-058777), 2022-11-01
Supplement: bmjopen-2021-058777supp001_data_supplement.pdf [file bmjopen-2021-058777supp001_data_supplement.pdf]

## SUPPLEMENTAL MATERIAL

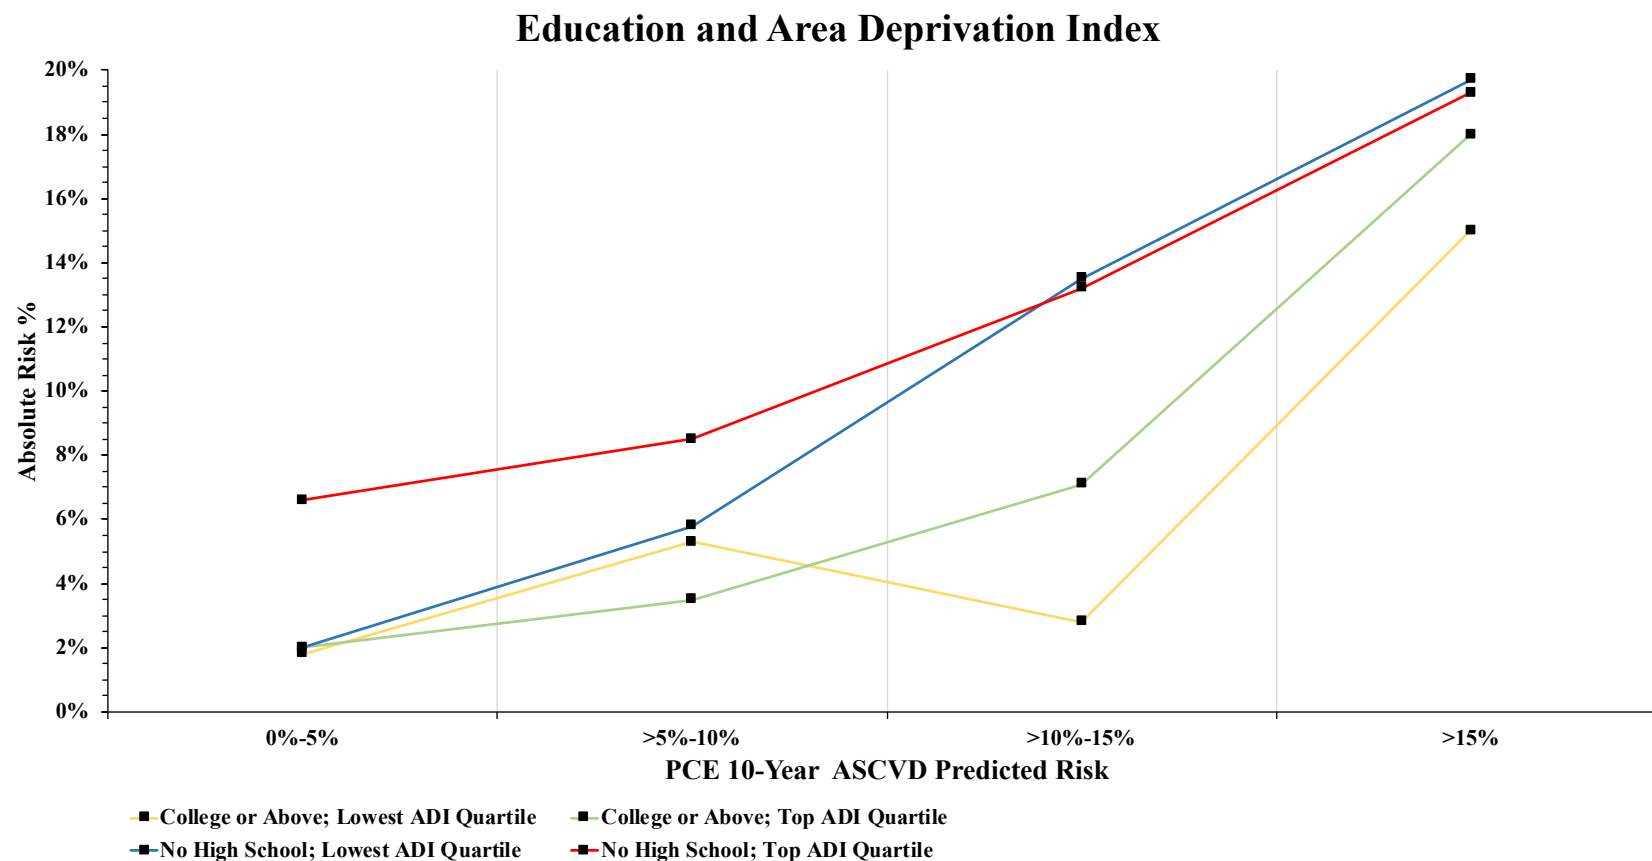

**Supplement Figure 1.** Absolute risk of ASCVD accounting for dose response of both education attainment and Area Deprivation Index.

Abbreviations: ADI, Area Deprivation Index; ASCVD, atherosclerotic cardiovascular disease; PCE, Pooled Cohort Equations.

\*Area Deprivation Index measures area-level social deprivation and estimated using the census-tract of participants' 9-digit zip code; higher values represent higher area-level social deprivation and categories were defined using quartiles of distribution.

†Analysis not powered to estimate the relationship between both socioeconomic status exposure variables simultaneously with absolute risk percentage; and convergence on 95% confidence interval point estimates were not obtained.

**Supplement Table 1.** Risk Ratios comparing 10-year incident ASCVD event rate across Socioeconomic Status (Education and Area Deprivation Index) within category of predicted risk

|                                         | 10-Year ASCVD Predicted Risk          |                                                 |                                             |                                       |                                                 |                                             |                                       |                                                 |                                             |                                       |                                                 |                                             |
|-----------------------------------------|---------------------------------------|-------------------------------------------------|---------------------------------------------|---------------------------------------|-------------------------------------------------|---------------------------------------------|---------------------------------------|-------------------------------------------------|---------------------------------------------|---------------------------------------|-------------------------------------------------|---------------------------------------------|
|                                         | 0%-5%                                 |                                                 |                                             | >5%-10%                               |                                                 |                                             | >10%-15%                              |                                                 |                                             | >15%                                  |                                                 |                                             |
|                                         | Area Deprivation Index                |                                                 |                                             | Area Deprivation Index                |                                                 |                                             | Area Deprivation Index                |                                                 |                                             | Area Deprivation Index                |                                                 |                                             |
|                                         | Top ADI<br>Quartile<br>RR (95%<br>CI) | Middle<br>Two ADI<br>Quartile<br>RR (95%<br>CI) | Lowest<br>ADI<br>Quartile<br>RR (95%<br>CI) | Top ADI<br>Quartile<br>RR (95%<br>CI) | Middle<br>Two ADI<br>Quartile<br>RR (95%<br>CI) | Lowest<br>ADI<br>Quartile<br>RR (95%<br>CI) | Top ADI<br>Quartile<br>RR (95%<br>CI) | Middle<br>Two ADI<br>Quartile<br>RR (95%<br>CI) | Lowest<br>ADI<br>Quartile<br>RR (95%<br>CI) | Top ADI<br>Quartile<br>RR (95%<br>CI) | Middle<br>Two ADI<br>Quartile<br>RR (95%<br>CI) | Lowest<br>ADI<br>Quartile<br>RR (95%<br>CI) |
| <b>No High<br/>School*</b>              | 3.64<br>(1.46-<br>9.07)               | --                                              | --                                          | 1.59<br>(0.92-<br>2.76)               | 1.18<br>(0.51-<br>2.72)                         | 1.10<br>(0.35-<br>3.48)                     | 4.78<br>(1.62-<br>14.09)              | 1.88<br>(0.69-<br>5.15)                         | 4.93<br>(1.94-<br>12.50)                    | 1.28<br>(0.94-<br>1.74)               | 1.22<br>(0.84-<br>1.77)                         | 1.31<br>(0.85-<br>2.02)                     |
| <b>High<br/>School/Some<br/>College</b> | 1.23<br>(0.43-<br>3.54)               | 1.23<br>(0.49-<br>3.09)                         | 1.07<br>(0.39-<br>2.92)                     | 1.04<br>(0.58-<br>1.88)               | 0.69<br>(0.36-<br>1.32)                         | 1.48<br>(0.87-<br>2.53)                     | 2.28<br>(0.89-<br>5.82)               | 2.48<br>(0.95-<br>6.47)                         | 2.52<br>(0.97-<br>6.52)                     | 0.95<br>(0.68-<br>1.34)               | 0.90<br>(0.65-<br>1.26)                         | 1.08<br>(0.75-<br>1.54)                     |
| <b>College or<br/>Above</b>             | 1.08<br>(0.30-<br>3.87)               | 2.33<br>(0.94-<br>5.75)                         | 1.00                                        | 0.66<br>(0.28-<br>1.53)               | 0.62<br>(0.28-<br>1.36)                         | 1.00                                        | 2.59<br>(1.00-<br>6.70)               | 2.48<br>(0.97-<br>6.36)                         | 1.00                                        | 1.20<br>(0.85-<br>1.69)               | 0.97<br>(0.67-<br>1.40)                         | 1.00                                        |

Abbreviations: ADI, Area Deprivation Index; ASCVD, atherosclerotic cardiovascular disease; CI, confidence interval; RR, relative risk.

\*Risk ratio cannot be estimated for social deprivation category at a predicted risk of 0-5% due to lack of ASCVD incidence for category.

### Education Attainment

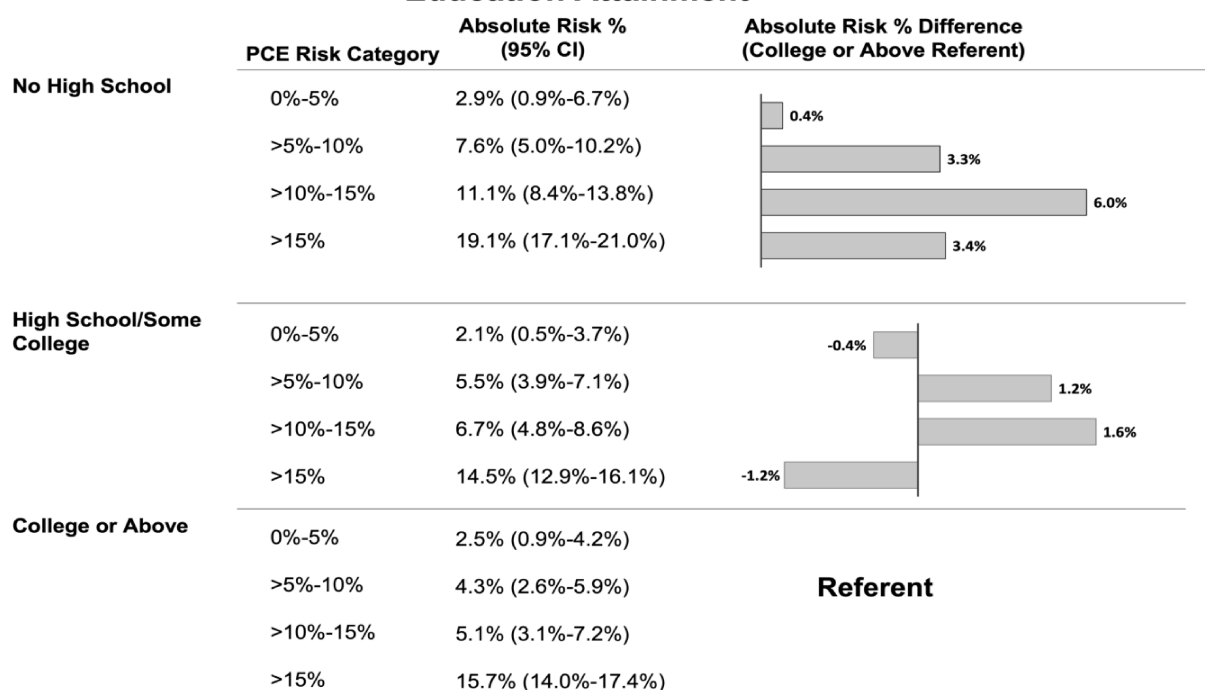

### Area Deprivation Index

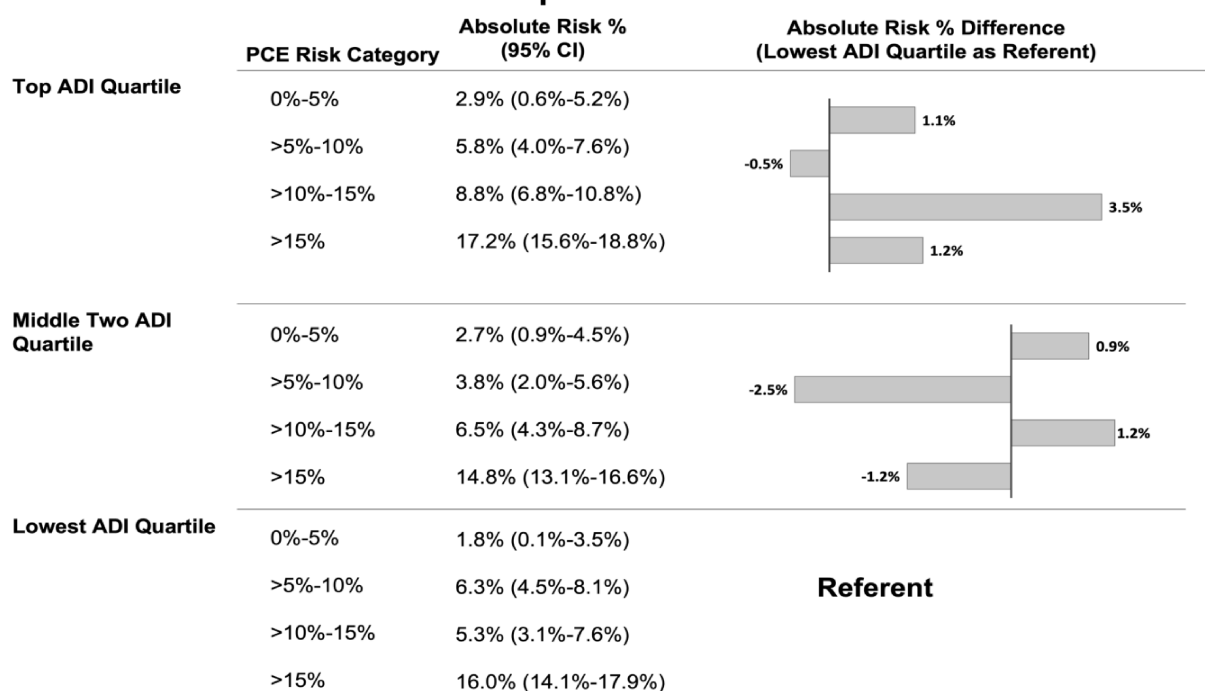

**Supplement Figure 2.** Difference in 10-year absolute risk of ASCVD events between levels of socioeconomic status, conditional on predicted risk category.

Abbreviations: ADI, Area Deprivation Index; ASCVD, atherosclerotic cardiovascular disease

\*Predicted risk categories were estimated using the Pooled Cohort Equations.
